# Supplementary material
Source: MDPI journal article supplement (https://www.mdpi.com/2079-6412/13/8/1329)
Supplement: s1 [file s1 › coatings-2495805-supplementary.pdf]

## Supplementary Materials

# Enhanced Performance of Nickel–Cobalt Oxides as Selective Coatings for Flat-Plate Solar Thermal Collector Applications

Reyna Dianela Bacelis-Martínez <sup>1,†</sup>, Dallely Melissa Herrera-Zamora <sup>2,†</sup>, Manuel Ávila Santos <sup>3</sup>, Octavio García-Valladares <sup>2</sup>, Adriana Paola Franco-Bacca <sup>1</sup>, Geonel Rodríguez-Gattorno <sup>1,\*</sup> and Miguel Ángel Ruiz-Gómez <sup>4,\*</sup>

<sup>1</sup> Department of Applied Physics, CINVESTAV-IPN, Mérida 97310, Yucatán, Mexico; reyna.bacelis@cinvestav.mx (R.D.B.-M.); adriana.franco@cinvestav.mx (A.P.F.-B.)

<sup>2</sup> Instituto de Energías Renovables de la Universidad Nacional Autónoma de México (IER-UNAM), Privada Xochicalco s/n Temixco, Temixco 62580, Morelos, Mexico; dmhz@ier.unam.mx (D.M.H.-Z.); ogv@ier.unam.mx (O.G.-V.)

<sup>3</sup> CICATA-Legaria, Instituto Politécnico Nacional, Ciudad de México 11500, Mexico; jmavilas@ipn.mx

<sup>4</sup> CONAHCYT-Department of Applied Physics, CINVESTAV-IPN, Mérida 97310, Yucatán, Mexico

\* Correspondence: geonelr@cinvestav.mx (G.R.-G.); miguel.ruiz@cinvestav.mx (M.Á. R.-G.)

† These authors contributed equally to this work.

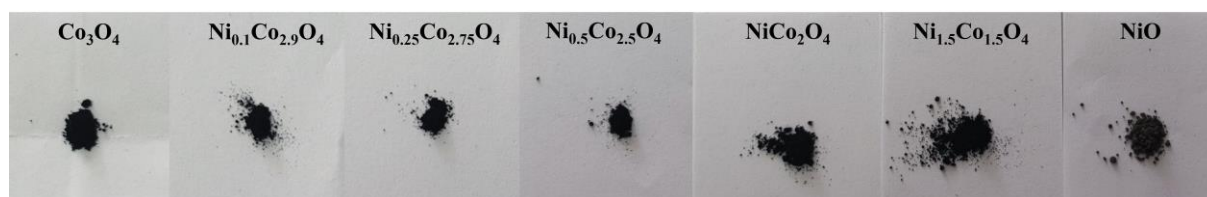

**Figure S1.** Photographs of all synthesized powders thermally treated at 500 °C.

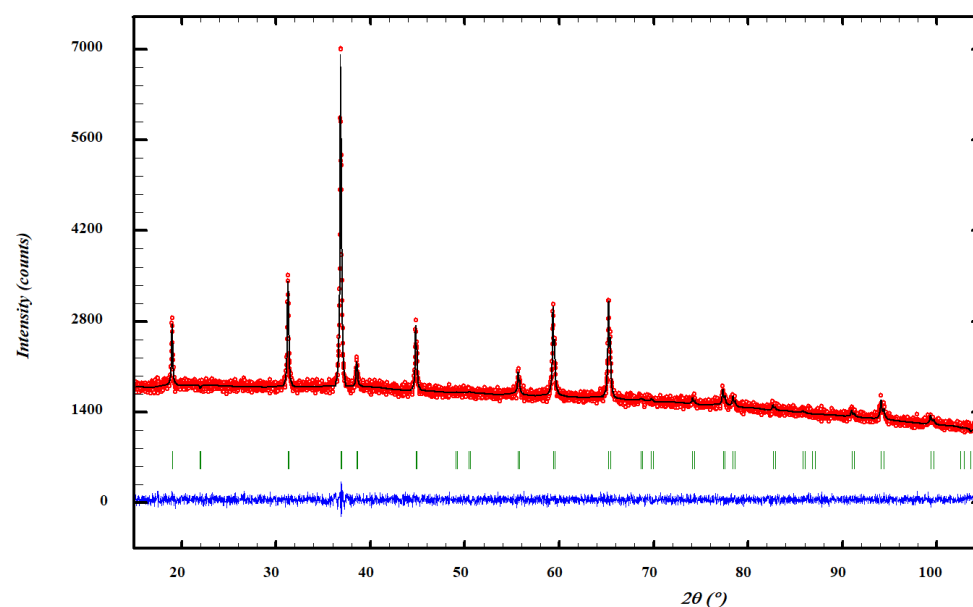

**Figure S2.** XRD powder pattern experimental (red), calculated (black) and profile fitting difference (blue) for the Le Bail refinement of the composition  $\text{Co}_3\text{O}_4$ . Green bars correspond to Bragg positions.

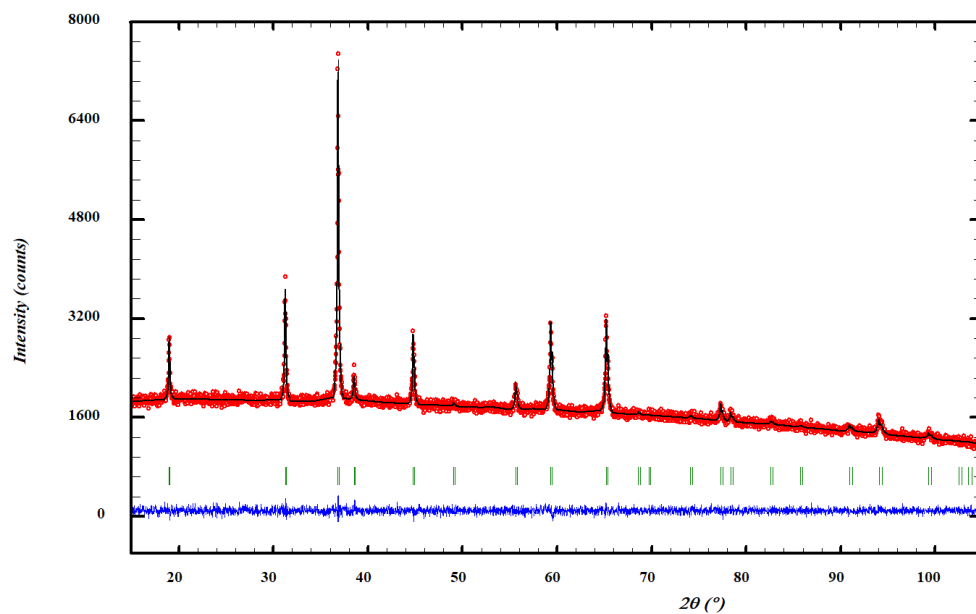

**Figure S3.** XRD powder pattern experimental (red), calculated (black) and profile fitting difference (blue) for the Le Bail refinement of the composition  $\text{Ni}_{0.1}\text{Co}_{2.9}\text{O}_4$ . Green bars correspond to Bragg positions.

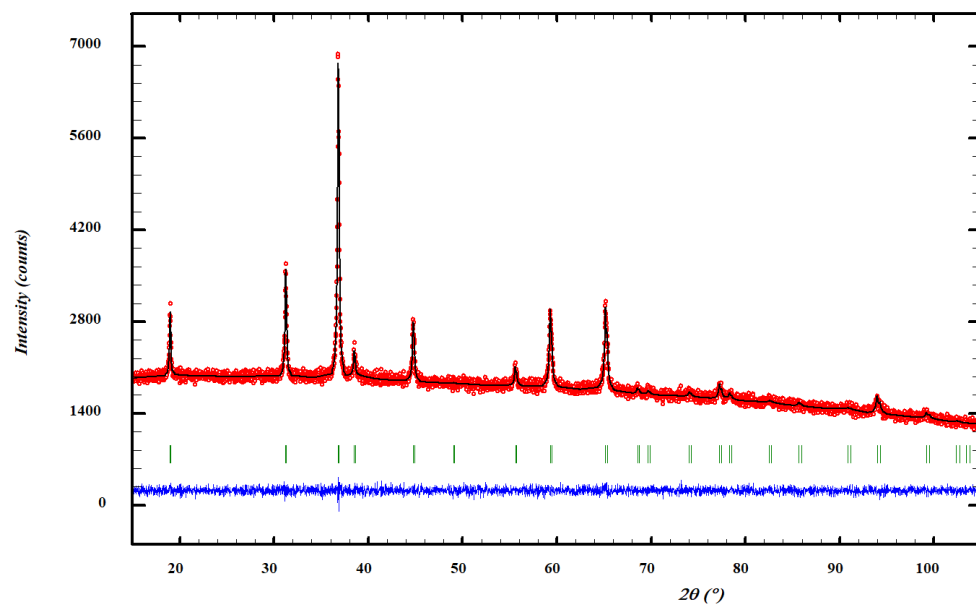

**Figure S4.** XRD powder pattern experimental (red), calculated (black) and profile fitting difference (blue) for the Le Bail refinement of the composition  $\text{Ni}_{0.25}\text{Co}_{2.75}\text{O}_4$ . Green bars correspond to Bragg positions.

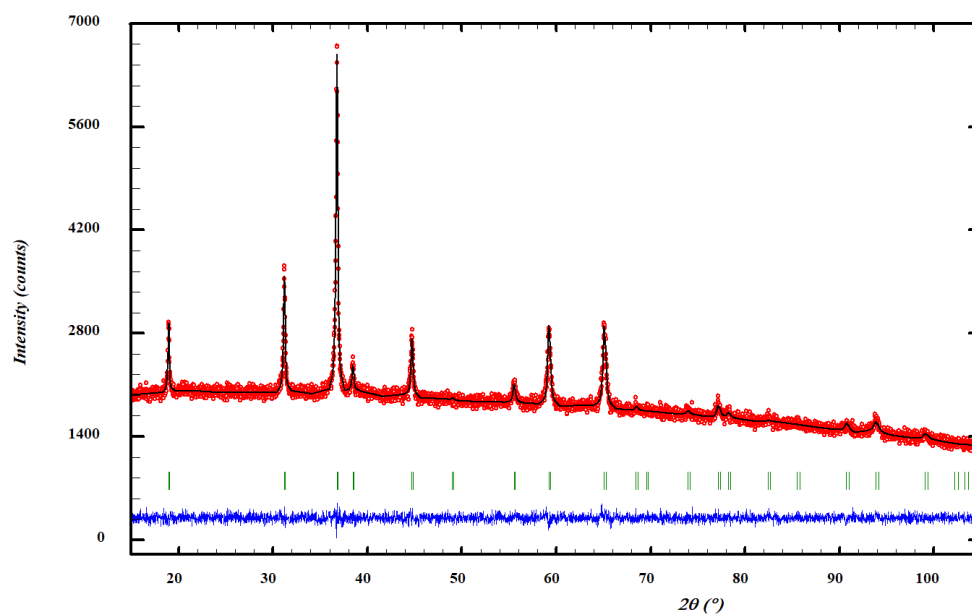

**Figure S5.** XRD powder pattern experimental (red), calculated (black) and profile fitting difference (blue) for the Le Bail refinement of the composition  $\text{Ni}_{0.5}\text{Co}_{2.5}\text{O}_4$ . Green bars correspond to Bragg positions.

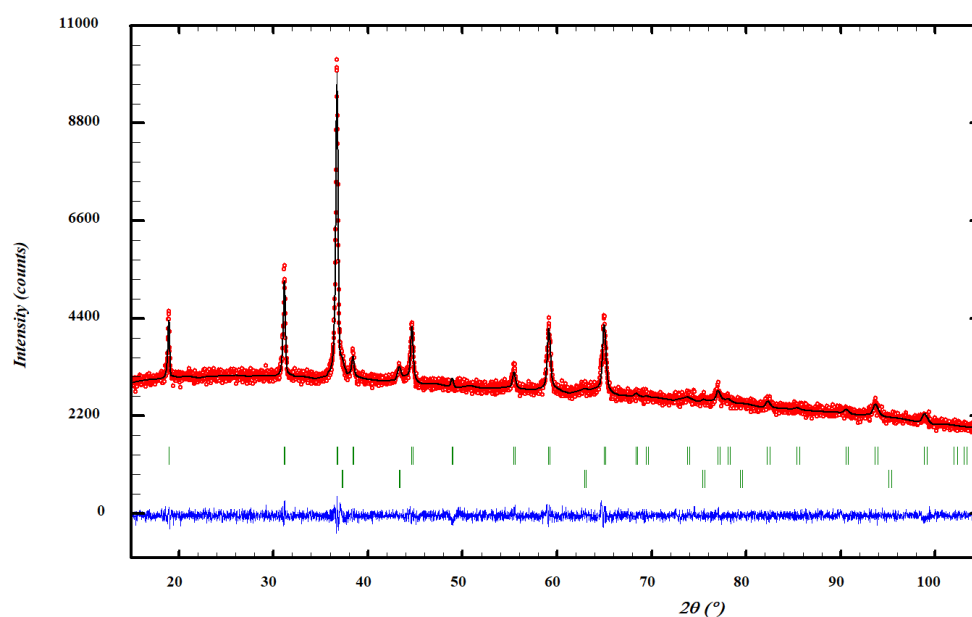

**Figure S6.** XRD powder pattern experimental (red), calculated (black) and profile fitting difference (blue) for the Rietveld refinement of the composition  $\text{NiCo}_2\text{O}_4$ . Green bars correspond to Bragg positions. The determined phase percentage is 96.1 % for  $\text{NiCo}_2\text{O}_4$  and 3.9 % for  $\text{NiO}$ .

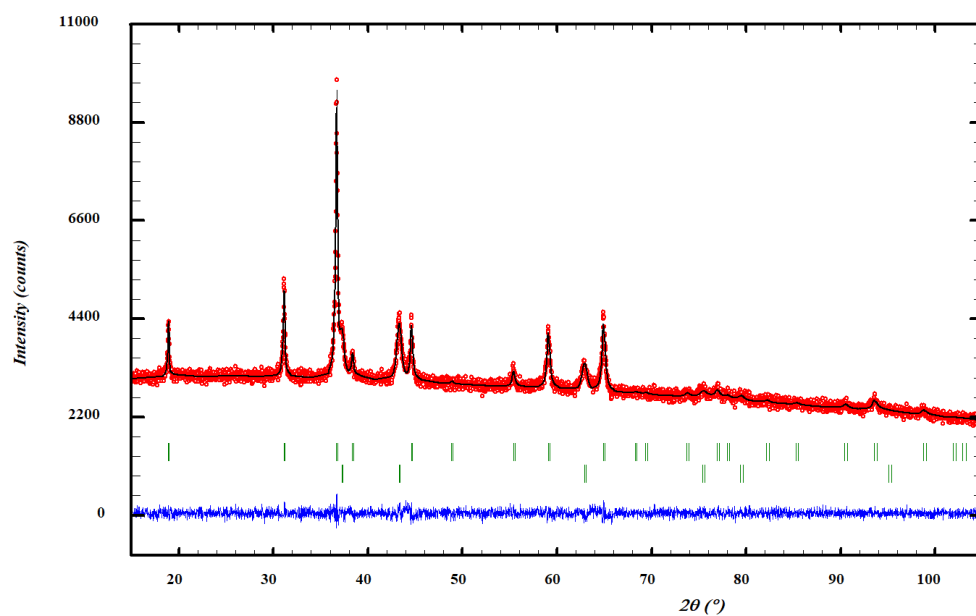

**Figure S7.** XRD powder pattern experimental (red), calculated (black) and profile fitting difference (blue) for the Rietveld refinement of the composition  $\text{Ni}_{1.5}\text{Co}_{1.5}\text{O}_4$ . Green bars correspond to Bragg positions. The determined phase percentage is 73.3 % for  $\text{NiCo}_2\text{O}_4$  and 26.7 % for  $\text{NiO}$ .

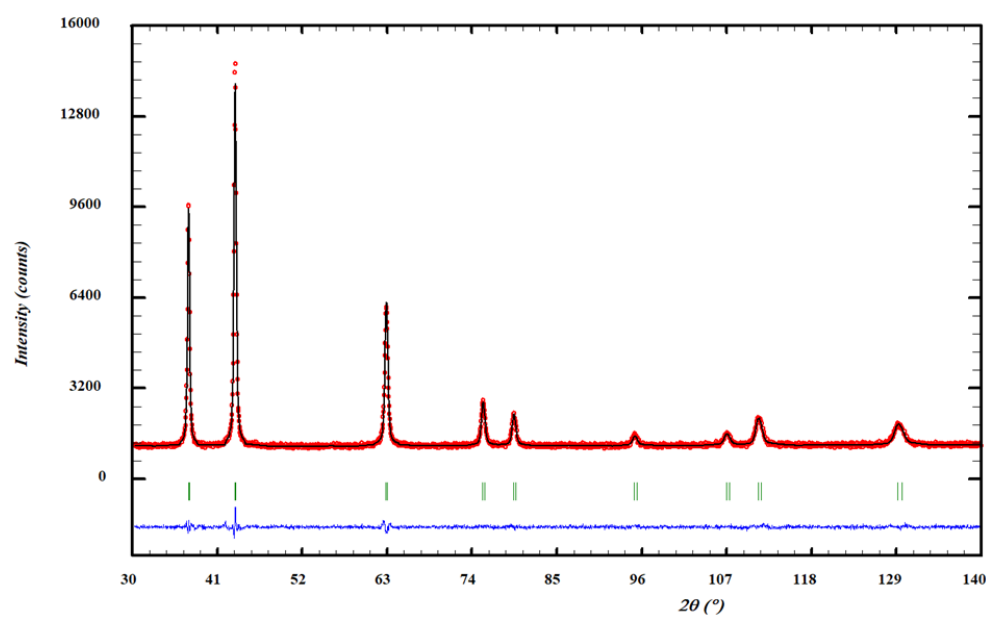

**Figure S8.** XRD powder pattern experimental (red), calculated (black) and profile fitting difference (blue) for the Le Bail refinement of the composition  $\text{NiO}$ . Green bars correspond to Bragg positions.

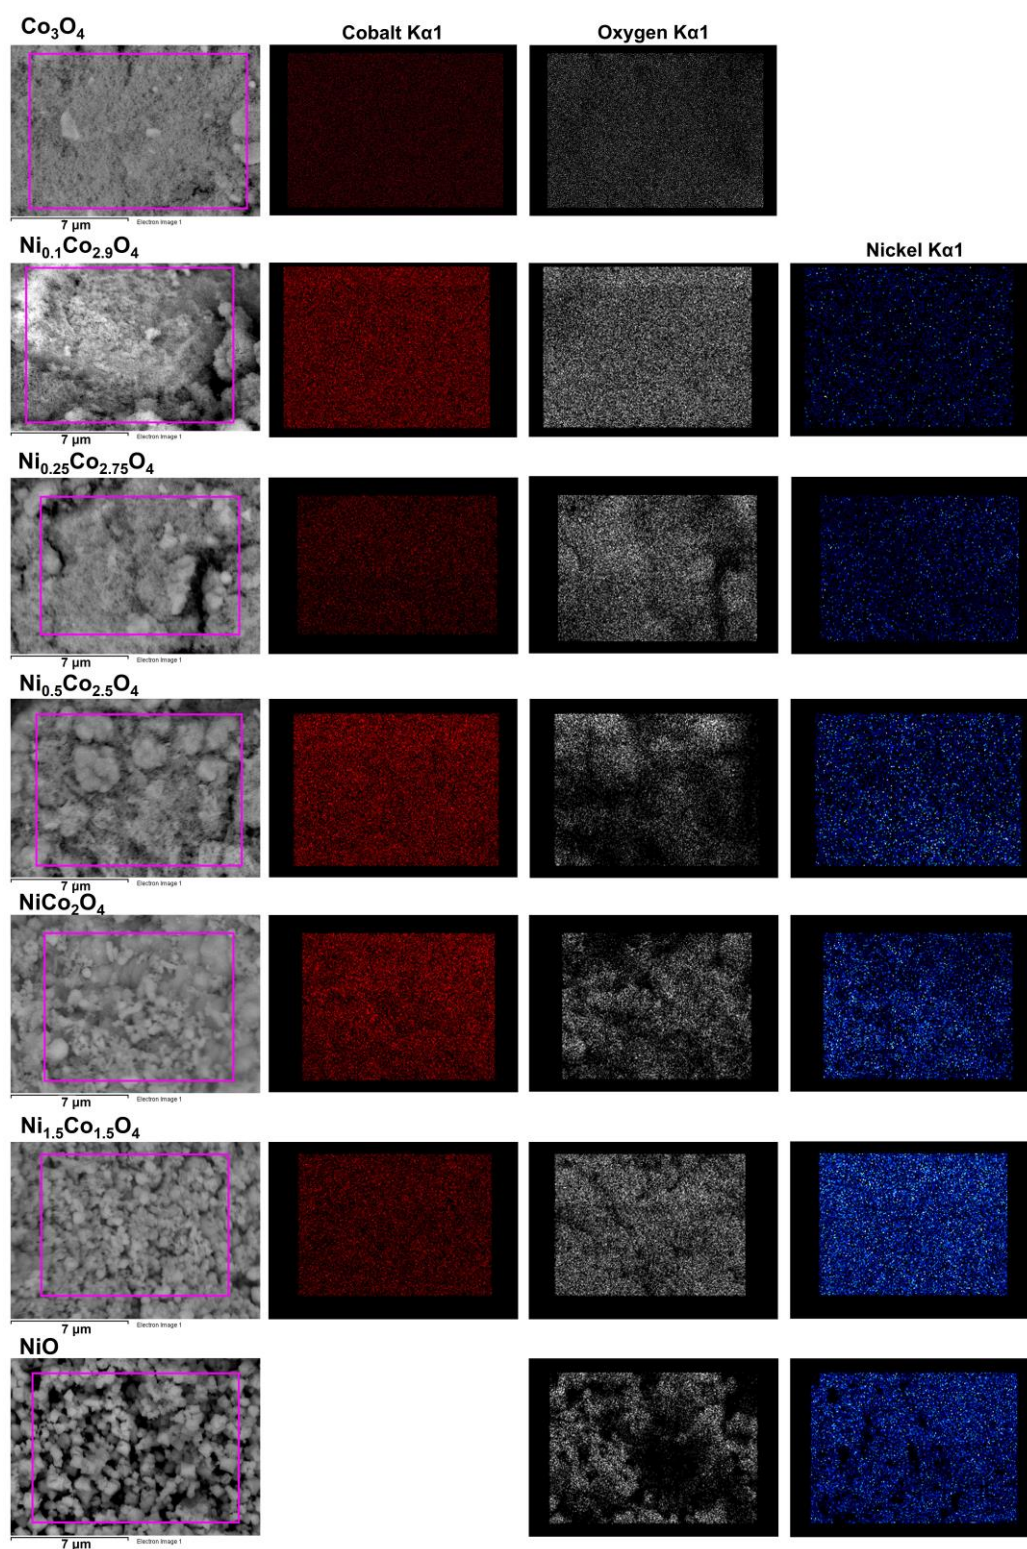

Figure S9. Representative SEM-EDS mappings for all synthesized samples.

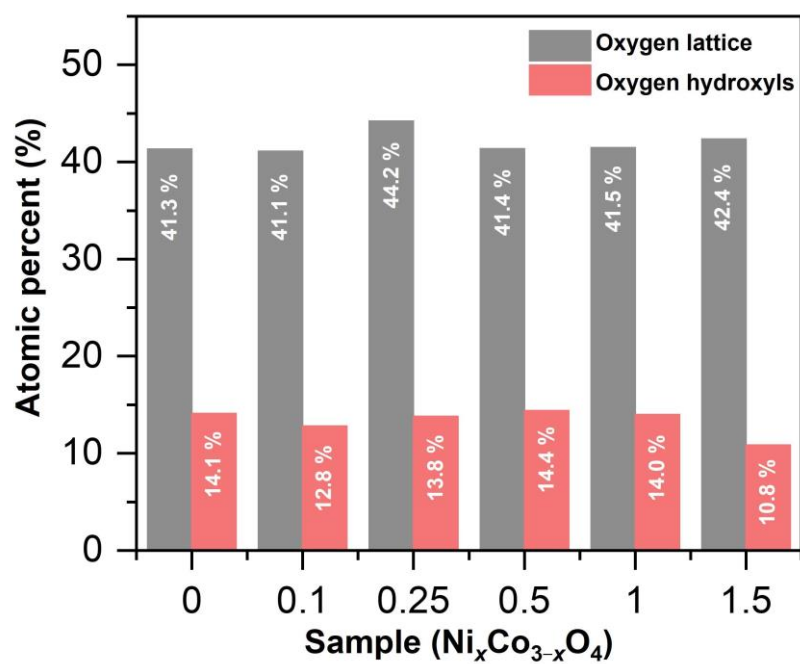

**Figure S10.** Atomic percent of surface oxygen obtained from XPS analysis for  $\text{Co}_3\text{O}_4$  and  $\text{Ni}_x\text{Co}_{3-x}\text{O}_4$  oxides.

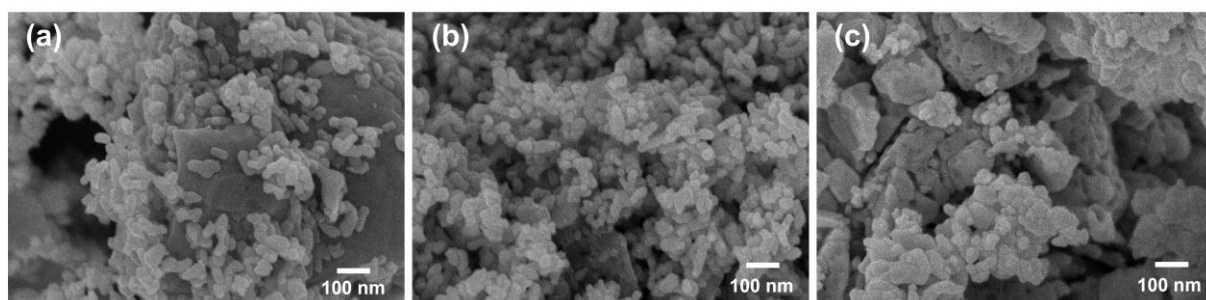

**Figure S11.** Representative SEM micrographs of selected samples: (a)  $\text{Ni}_{0.1}\text{Co}_{2.9}\text{O}_4$ , (b)  $\text{Ni}_{0.5}\text{Co}_{2.5}\text{O}_4$  and (c)  $\text{Ni}_{1.5}\text{Co}_{1.5}\text{O}_4$ .

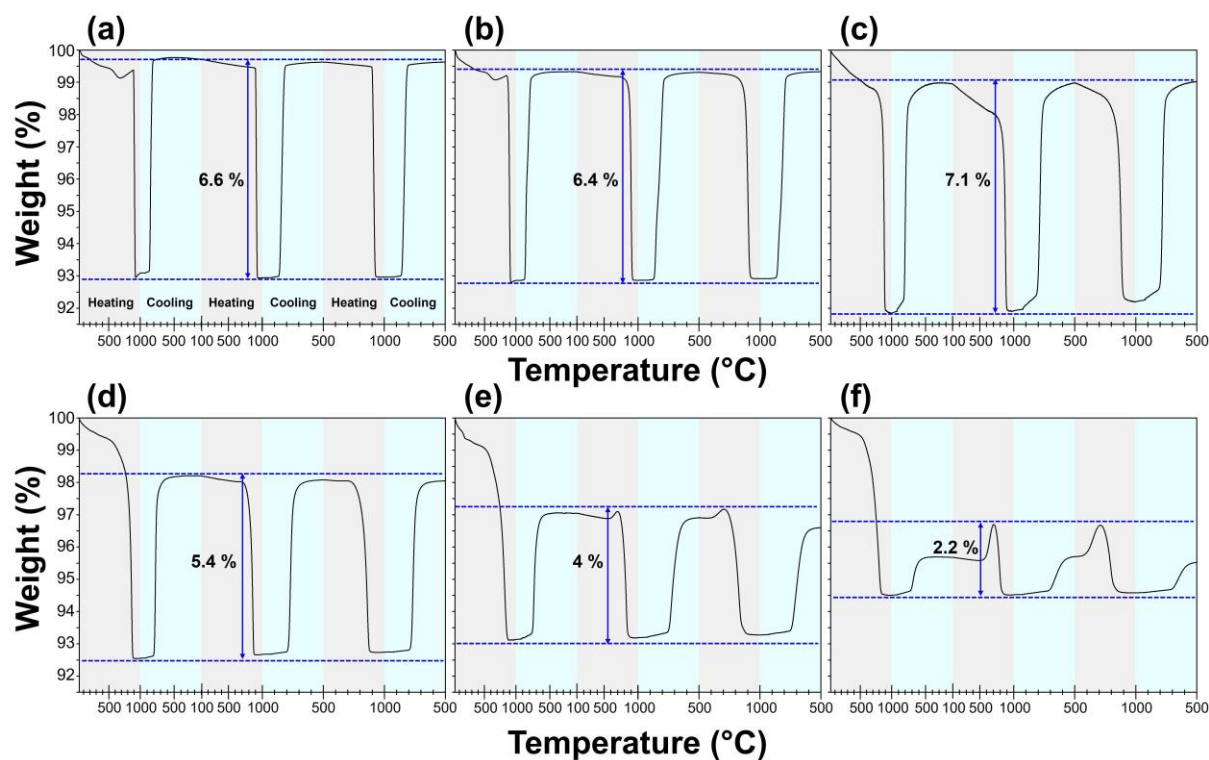

**Figure S12.** Comparative weight variation obtained at 5 °C/min without dwell during three heating-cooling cycles for (a)  $\text{Co}_3\text{O}_4$  and  $\text{Ni}_x\text{Co}_{3-x}\text{O}_4$  with  $x =$  (b) 0.1, (c) 0.25, (d) 0.5, (e) 1.0 and (f) 1.5.

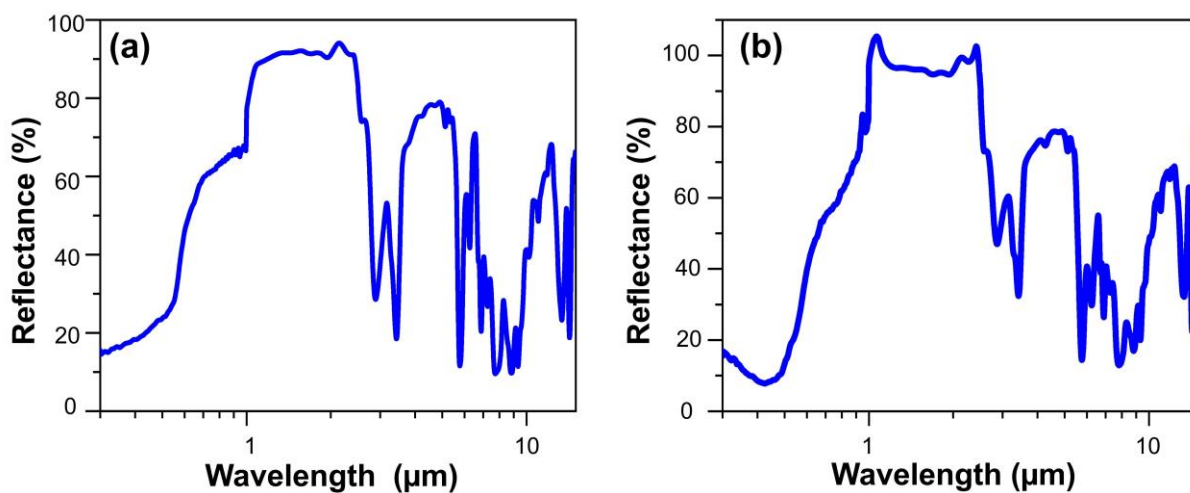

**Figure S13.** Reflectance spectra for polymeric resin on aluminum substrate: (a) as-painted and (b) thermal treated at 200 °C for 24 h.

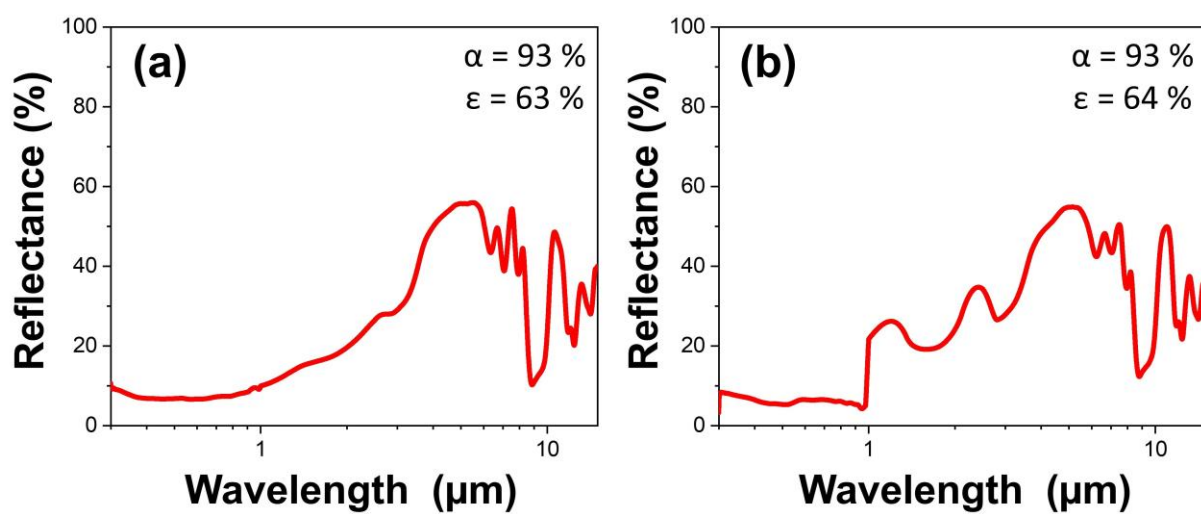

**Figure S14.** Reflectance spectra for two sets of brush-painted aluminum plates using the commercial paint Solkote®: (a) without thermal treatment and (b) thermal treated at 200 °C for 24 h..
